# Supplementary material for: Clustering and Graph Mining Techniques for Classification of Complex Structural Variations in Cancer Genomes
Source: Research Square preprint supplement (doi:10.21203/rs.3.rs-476852/v2), 2021-07-14
Supplement: Supplementary file 1 [file 815100008a3520d0f363325a.pdf]

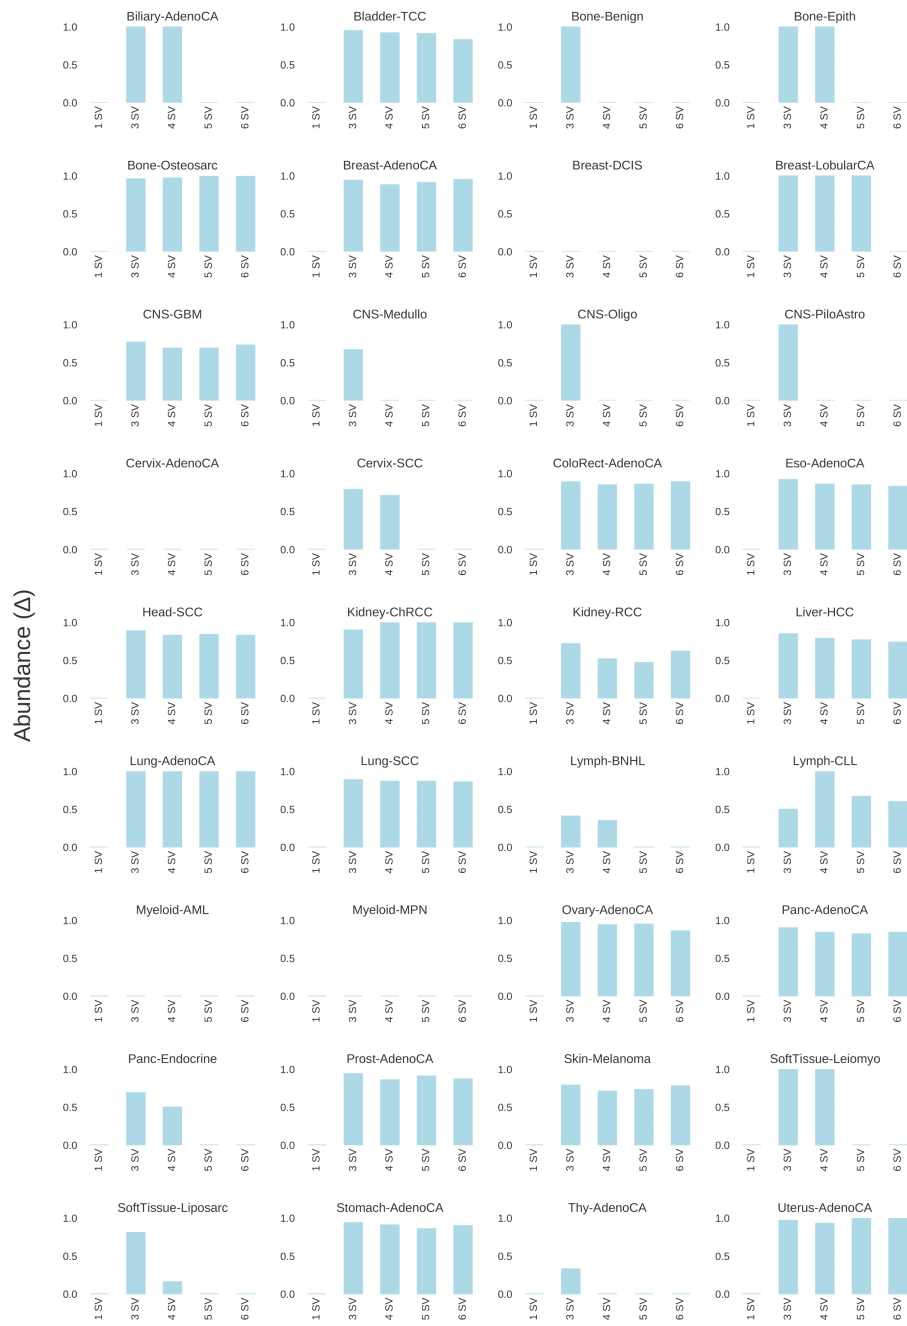

Figure S1: Abundance values of the evaluated cycles for the 36 cancer types. Cycles with an Abundance = 0 do not have any pattern both in the simulation and in the original dataset.

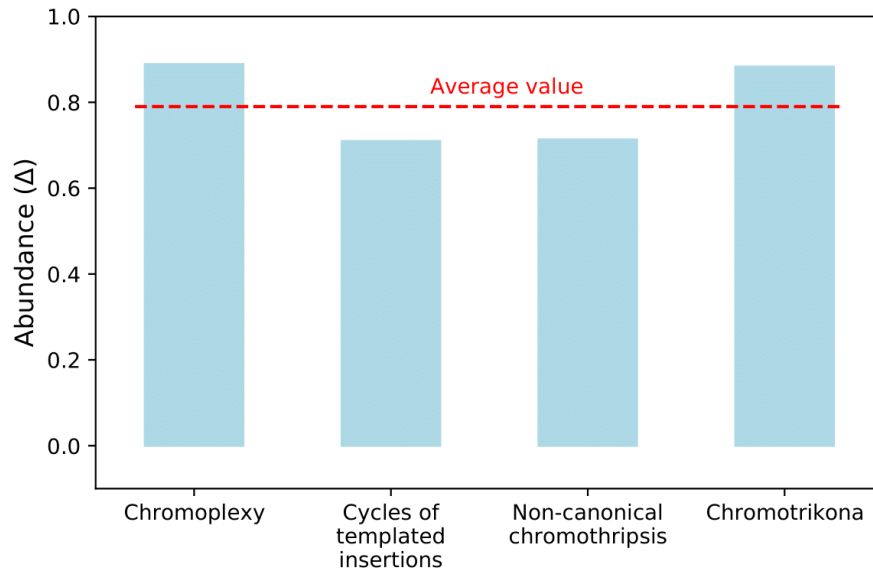

Figure S2: Abundance values for different triangle categories.

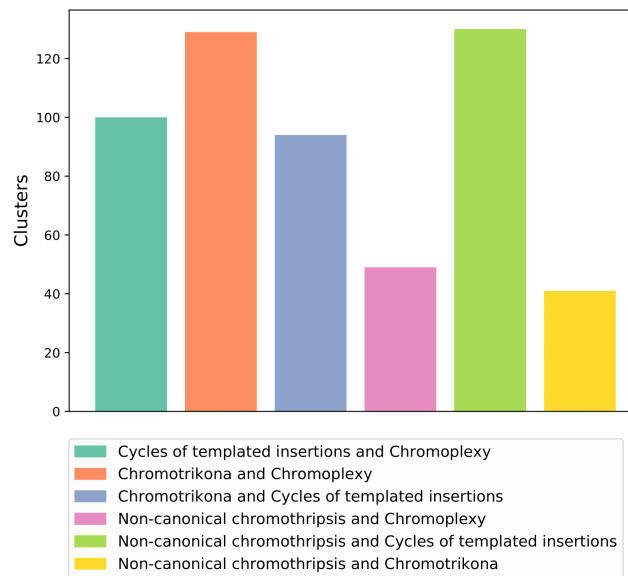

Figure S3: Common clusters between every pair of triangle types.
